# Supplementary material for: Plant sphingolipids promote extracellular vesicle release and alleviate amyloid-β pathologies in a mouse model of Alzheimer’s disease
Source: PubMed Central journal article supplement (PMC6856149; doi:10.1038/s41598-019-53394-w), 2019-11-14
Supplement: 41598_2019_53394_MOESM1_ESM.pdf [file 41598_2019_53394_MOESM1_ESM.pdf]

## Supplementary information

### Plant sphingolipids promote extracellular vesicle release and alleviate amyloid- $\beta$ pathologies in a mouse model of Alzheimer's disease

Kohei Yuyama, Kaori Takahashi, Seigo Usuki, Daisuke Mikami, Hui Sun, Hisatoshi Hanamatsu, Junichi Furukawa, Katsuyuki Mukai, Yasuyuki Igarashi

#### Supplementary Figures and Table:

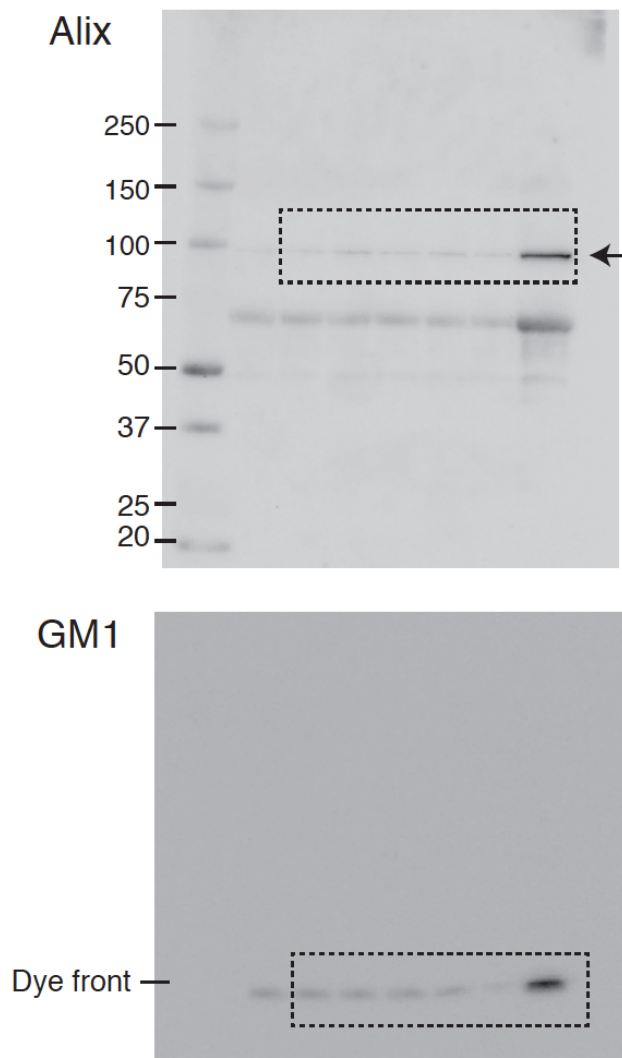

#### Supplementary Fig.S1

Full-length blots for Fig. 1d.

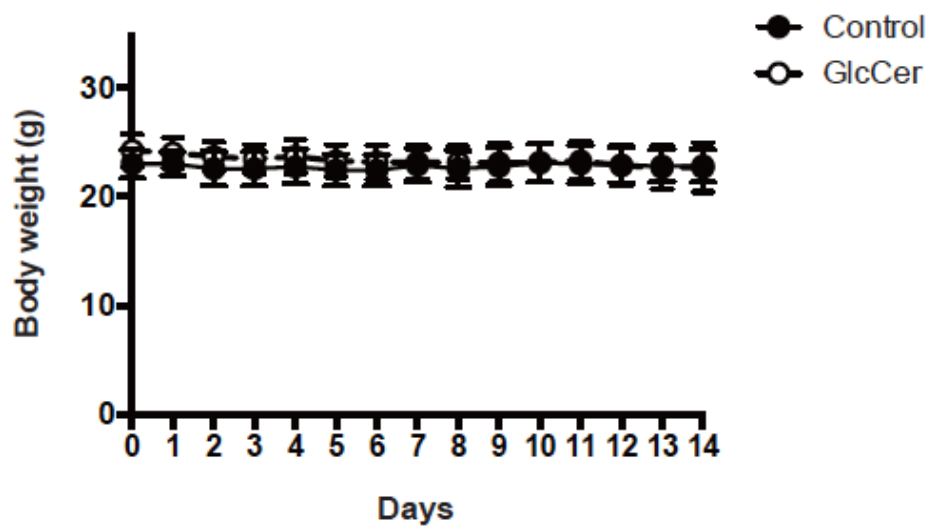

**Supplementary Fig.S2**

Body weights during plant GlcCer administration.

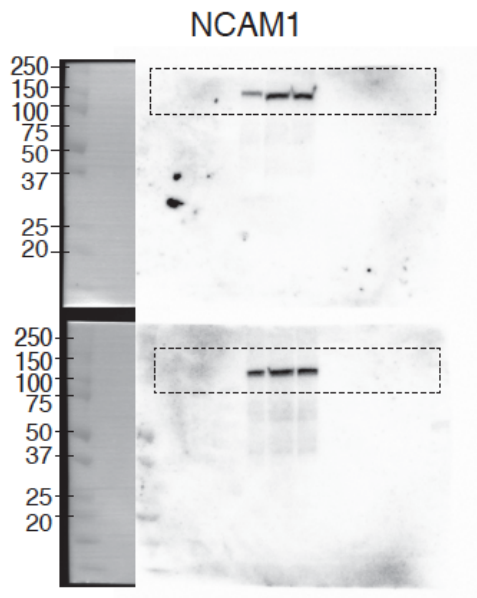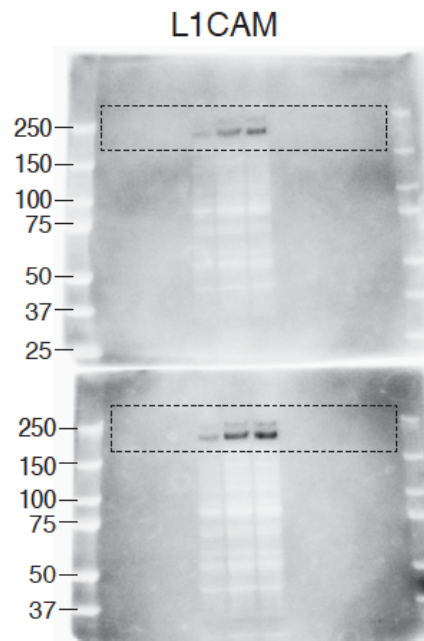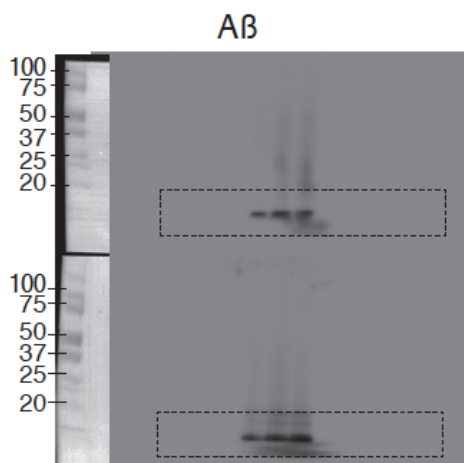

**Supplementary Fig.S3**

Full-length blots for Fig. 5e.

### Modified SHRPA results

| SHIRPA                    |                     |                | Control | GlcCer |
|---------------------------|---------------------|----------------|---------|--------|
| <i>In the Viewing Jar</i> | Coat color          | Abnormal       | 0/14    | 0/14   |
|                           | White belly         | No             | 14/14   | 14/14  |
|                           | Hair length         | Abnormal       | 0/14    | 0/14   |
|                           | Tremor              | Present        | 0/14    | 0/14   |
|                           | Body position       | Flat           | 14/14   | 14/14  |
|                           | Whiskers            | Abnormal       | 0/14    | 0/14   |
|                           | Palpebral closure   | Open           | 14/14   | 14/14  |
|                           | Lacrimation         | Present        | 0/14    | 0/14   |
| <i>In the Arena</i>       | Transfer arousal    | < 1 sec        | 4/14    | 3/14   |
|                           |                     | 1-5 sec        | 10/14   | 11/14  |
|                           |                     | >5 sec         | 0/14    | 0/14   |
|                           | *Locomotor activity | sec            | 16.49   | 15.96  |
|                           | Gait                | Fluid movement | 14/14   | 14/14  |
|                           | Grasp reflex        | Present        | 14/14   | 14/14  |
|                           | Biting              | Present        | 3/14    | 2/14   |
|                           | Tail elevation      | Elevated       | 10/14   | 9/14   |
|                           |                     | Extended       | 3/14    | 3/14   |
|                           | Touch escape        | Drag           | 1/14    | 2/14   |
| Mild                      |                     | 2/14           | 1/14    |        |
|                           | Moderate            | 12/14          | 13/14   |        |
| <i>Above the Arena</i>    | Skin color          | Pink           | 14/14   | 14/14  |
|                           | Trunk curl          | Present        | 0/14    | 0/14   |
|                           | Limb grasping       | Present        | 0/14    | 0/14   |
|                           | Pinna reflex        | Present        | 14/14   | 14/14  |
|                           | Cornial reflex      | Present        | 14/14   | 14/14  |
|                           | Vocalization        | Present        | 3/14    | 2/14   |

\*Unpaired t-test:  $p=0.8036$  (Control  $n=14$ , GlcCer  $n=14$ )

### Supplementary Table S1
